# Supplementary material for: Genetic Diversity and Geographical Distribution of the Red Tide Species Coscinodiscus granii Revealed Using a High-Resolution Molecular Marker
Source: MDPI journal article supplement (doi:10.3390/microorganisms10102028), 2022-10-14
Supplement: s1 [file s1]

**Table S1** The sampling station information of environmental samples

| Longitude (°E) | Latitude (°N) | Stations | Sampling time |
|----------------|---------------|----------|---------------|
| 110.07         | 20.2          | ZN1-7    | 2019.01       |
| 109            | 21.17         | ZN4-3    | 2019.01       |
| 109.33         | 21.17         | ZN4-4    | 2019.01       |
| 109.01         | 20.17         | ZN1-3    | 2019.01       |
| 108.59         | 21.67         | ZN6-2    | 2019.01       |
| 108.61         | 20.5          | ZN2-2    | 2019.01       |
| 120.38         | 36.03         | D8       | 2019.03       |
| 120.29         | 36.02         | D5       | 2019.03       |
| 120.23         | 36.04         | D3       | 2019.03       |
| 120.23         | 36.07         | D1       | 2019.03       |
| 120.29         | 36.1          | C4       | 2019.03       |
| 120.25         | 36.1          | C3       | 2019.03       |
| 120.18         | 36.1          | C1       | 2019.03       |
| 120.19         | 36.13         | B2       | 2019.03       |
| 120.33         | 36.15         | A5       | 2019.03       |
| 120.25         | 36.16         | A3       | 2019.03       |
| 121.23         | 31.66         | C2       | 2019.03       |
| 121.91         | 31.15         | C8       | 2019.03       |
| 123            | 30.72         | A6-7     | 2019.03       |
| 122.25         | 30.95         | A6-2     | 2019.03       |
| 121.78         | 31.41         | B4       | 2019.03       |
| 121.49         | 31.5          | B2       | 2019.03       |
| 122.57         | 29.72         | A10-2    | 2019.03       |
| 122.84         | 29.62         | A10-4    | 2019.03       |
| 123.48         | 29.98         | A8-6     | 2019.03       |
| 122.7          | 30.23         | A8-2     | 2019.03       |
| 117.7          | 22.73         | 101-2    | 2019.06       |
| 116.95         | 22.64         | Mar-96   | 2019.06       |
| 115.99         | 22.44         | Mar-84   | 2019.06       |
| 115.52         | 22.17         | Jan-75   | 2019.06       |
| 111.5          | 19.59         | 125-1    | 2019.06       |
| 111.29         | 20            | 118-1    | 2019.06       |
| 114.34         | 22.09         | Feb-46   | 2019.06       |
| 113.93         | 21.45         | Feb-41   | 2019.06       |
| 113.31         | 21.3          | 2 月 27 日 | 2019.06       |
| 112.84         | 21.51         | 3 月 16 日 | 2019.06       |
| 121.67         | 26.6          | S05-3    | 2019.09       |
| 121.99         | 26.4          | S05-4    | 2019.09       |
| 123.32         | 26.76         | S04-5    | 2019.09       |
| 122.06         | 27.54         | S04-2    | 2019.09       |
| 122.7          | 28.37         | S03-2    | 2019.09       |
| 123.09         | 28.15         | S03-3    | 2019.09       |

|        |       |       |         |
|--------|-------|-------|---------|
| 123.22 | 29.38 | S02-2 | 2019.09 |
| 122.8  | 29.6  | S02-1 | 2019.09 |
| 124.8  | 30    | S01-5 | 2019.09 |
| 124.35 | 30.25 | S01-4 | 2019.09 |
| 121.17 | 37.93 | N24   | 2019.10 |
| 121.27 | 38.29 | N22   | 2019.10 |
| 122.11 | 38.65 | N18   | 2019.10 |
| 122.25 | 37.76 | N14   | 2019.10 |
| 122.92 | 38.39 | N12   | 2019.10 |
| 123.25 | 38.76 | N10   | 2019.10 |
| 123.77 | 39.22 | N08   | 2019.10 |
| 123.74 | 38.23 | N06   | 2019.10 |
| 123.24 | 37.74 | N04   | 2019.10 |
| 123.51 | 37.5  | N02   | 2019.10 |
| 119.32 | 38.47 | B25   | 2019.10 |
| 119.67 | 38.87 | B23   | 2019.10 |
| 120.24 | 39.33 | B21   | 2019.10 |
| 120.92 | 39.54 | B19   | 2019.10 |
| 120.32 | 39.13 | B15   | 2019.10 |
| 119.71 | 39.31 | B13   | 2019.10 |
| 118.97 | 38.94 | B11   | 2019.10 |
| 118.97 | 38.65 | B09   | 2019.10 |
| 119.44 | 38.35 | B05   | 2019.10 |
| 120.21 | 38.34 | B03   | 2019.10 |

---
